# Supplementary material
Source: Springer Nature journal article supplement (https://www.springermedizin.de/resource/supplementary/12939_2010_166_MOESM4_ESM.pdf/9551632)

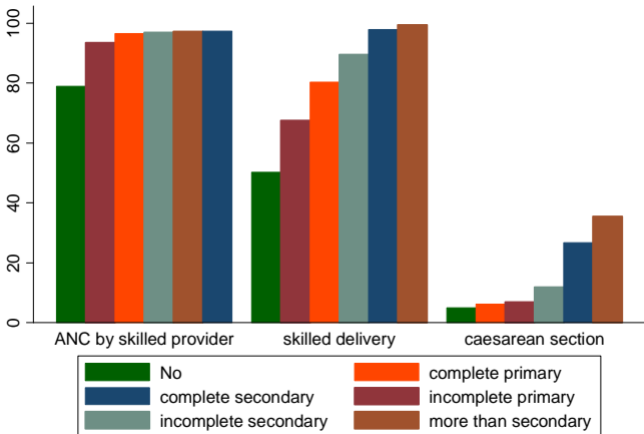

Source of data: Namibia DHS 2006-07

Supplement: MOESM4 [file 9551632]
